# Supplementary material for: Elevated expression of placental growth factor is associated with airway-wall vascular remodelling and thickening in smokers with asthma
Source: PubMed Central journal article supplement (PMC5318961; doi:10.1038/srep43017), 2017-02-21
Supplement: srep43017-s1.pdf [file srep43017-s1.pdf]

Elevated expression of placental growth factor is associated with airway-wall vascular remodelling and thickening in smokers with asthma

Dong Wu<sup>1,#</sup>, Tianwen Lai<sup>1,#</sup>, Yalian Yuan<sup>1,#</sup>, Min Chen<sup>1</sup>, Jun Xia<sup>2</sup>, Wen Li<sup>1</sup>, Guihai Pan<sup>2</sup>,  
Binfan Yuan<sup>1</sup>, Quanchao Lv<sup>1</sup>, Yanyu Li<sup>1</sup>, Dongmin Li<sup>1,\*</sup>, Bin Wu<sup>1,\*</sup>

<sup>1</sup> Institute of Respiratory Diseases, Department of Respiratory, The Affiliated Hospital of Guangdong Medical University, Zhanjiang 524001, China

<sup>2</sup> Department of Radiology, The Affiliated Hospital of Guangdong Medical University, Zhanjiang 524001, China

\*To whom correspondence should be addressed:

Prof Bin Wu

Institute of Respiratory, The Affiliated Hospital of Guangdong Medical University,  
Zhanjiang 524001, China    Tel: +86-07592386792    E-mail: [wubin1190@126.com](mailto:wubin1190@126.com)

Prof Dongmin Li

Department of Respiratory, The Affiliated Hospital of Guangdong Medical University,  
Zhanjiang 524001, China    Tel: +86-07592386792    E-mail: [3064264@qq.com](mailto:3064264@qq.com)

# These authors contributed equally to this work.

Supplemental Table 1. Association between serum, induced sputum PIGF levels and lung function in four groups.

|                                  | Groups                         | Pre-bronchodilator<br>FEV <sub>1</sub> % pred | Post-bronchodilator<br>FEV <sub>1</sub> % pred | Post-bronchodilator<br>FEV <sub>1</sub> /FVC | DLCO% pred<br>COHb       | FeNO <sub>50</sub>       |
|----------------------------------|--------------------------------|-----------------------------------------------|------------------------------------------------|----------------------------------------------|--------------------------|--------------------------|
| <b>serum<br/>PIGF<br/>levels</b> | Smoking<br>asthmatics          | 0.162<br>(-0.184-0.494)                       | -0.735<br>(0.065-0.599)*                       | -0.139<br>(0.070-0.626)*                     | 0.089<br>(-0.279-0.463)  | 0.168<br>(-0.132-0.435)  |
|                                  | Non-smoking<br>asthmatics      | 0.217<br>(-0.135-0.563)                       | 0.231<br>(-0.081-0.534)                        | 0.181<br>(-0.134-0.465)                      | -0.098<br>(-0.398-0.229) | 0.179<br>(-0.159-0.439)  |
|                                  | Smoking<br>healthy control     | 0.284<br>(-0.089-0.545)                       |                                                |                                              |                          | -0.228<br>(-0.591-0.124) |
|                                  | Non-smoking<br>healthy control | 0.201<br>(-0.103-0.567)                       |                                                |                                              |                          | -0.255<br>(-0.567-0.421) |

|                                               |                                |                         |                          |                          |                                 |                          |
|-----------------------------------------------|--------------------------------|-------------------------|--------------------------|--------------------------|---------------------------------|--------------------------|
| <b>induced<br/>sputum<br/>PIGF<br/>levels</b> | Smoking<br>asthmatics          | 0.225<br>(-0.064-0.515) | -0.568<br>(0.008-0.587)# | -0.170<br>(0.105-0.614)# | 0.189<br>(-0.159-0.503)         | -0.172<br>(-0.517-0.209) |
|                                               | Non-smoking<br>asthmatics      | 0.151<br>(-0.179-0.451) | 0.173<br>(-0.159-0.465)  | 0.113<br>(-0.184-0.413)  | -0.356<br>(-0.635- -0.138)<br># | 0.065<br>(-0.284-0.367)  |
|                                               | Smoking<br>healthy control     | 0.131<br>(-0.169-0.434) |                          |                          |                                 | -0.041<br>(-0.357-0.279) |
|                                               | Non-smoking<br>healthy control | 0.103<br>(-0.249-0.425) |                          |                          |                                 | 0.185<br>(-0.159-0.506)  |

\*Indicate significant associations for serum PIGF level. #Indicate significant associations for induced sputum PIGF level. FEV1: forced expiratory volume in 1s; FVC: forced vital capacity;  $D_{LCO}\%$  pred COHb: diffusing capacity of the lung for carbonmonoxide corrected for haemoglobin and carboxyhaemoglobin, as a percentage of the predicted value;  $FeNO_{50}$  : exhaled nitric oxide fraction measured at a flow rate of  $50 \text{ mL} \cdot \text{s}^{-1}$ .

Supplemental Table 2. Association between serum, induced sputum PIGF levels and computed tomography RB10 airway dimensions in asthmatics

|                                   | Groups                    | RB10 %<br>wall area     | RB10 wall<br>thickness  | RB10 lumen<br>area       |
|-----------------------------------|---------------------------|-------------------------|-------------------------|--------------------------|
| <b>serum PIGF levels</b>          | Smoking<br>asthmatics     | 0.069<br>(-0.254–0.383) | 0.545<br>(0.102–0.668)* | -0.038<br>(-0.364–0.312) |
|                                   | Non-smoking<br>asthmatics | 0.034<br>(-0.276–0.415) | 0.081<br>(-0.263–0.387) | 0.213<br>(-0.067–0.551)  |
| <b>induced sputum PIGF levels</b> | Smoking<br>asthmatics     | 0.076<br>(-0.317–0.420) | 0.571<br>(0.189–0.728)# | 0.169<br>(-0.153–0.438)  |
|                                   | Non-smoking<br>asthmatics | 0.081<br>(-0.243–0.444) | 0.138<br>(-0.249–0.431) | 0.096<br>(-0.253–0.432)  |

\*Indicate significant associations for serum PIGF level. #Indicate significant associations for induced sputum PIGF level.; RB10: right bronchial division 10.
